# Supplementary material for: Peeping at creAItivity through 615 keyholes: Creative self-perceptions, potential, and enhancement of GenAI chatbots
Source: Research Square preprint supplement (doi:10.21203/rs.3.rs-6148372/v1), 2025-04-14
Supplement: Supplementary file 1 [file 5842ae3baefefbbc25d306ef.docx]

**S1. Benchmark stories**

**ST1. The first definition of the word “keyhole” in the Wiktionary[[1]](#footnote-1).**

The hole in a lock where the key is inserted and turns.

**ST2. The second definition of the word “keyhole” in the Wiktionary[[2]](#footnote-2).**

Any small opening resembling the hole for a key in shape or function; especially, one that gives a vista of, or access to, a space beyond.

**ST3. Wikipedia description[[3]](#footnote-3) of 1933 film entitled “The Keyhole”.**

A woman with two husbands tries to divorce one of them by heading down to Havana where things get more complicated.

**ST4. Lorem ipsum placeholder text.**

Lorem ipsum dolor sit amet, consectetur adipiscing elit, sed do eiusmod tempor incididunt ut labore et dolore magna aliqua. Ut enim ad minim veniam, quis nostrud exercitation ullamco laboris nisi ut aliquip ex ea commodo consequat. Duis aute irure dolor in reprehenderit in voluptate velit esse cillum dolore eu fugiat nulla pariatur. Excepteur sint occaecat cupidatat non proident, sunt in culpa qui officia deserunt mollit anim id est laborum.

**ST5. Random gibberish text generated by randomtextgenerator.com**

Civility vicinity graceful is it at. Improve up at to on mention perhaps raising. Way building not get formerly her peculiar. Up uncommonly prosperous sentiments simplicity acceptance to so. Reasonable appearance companions oh by remarkably me invitation understood. Pursuit elderly ask perhaps all.

New had happen unable uneasy. Drawings can followed improved out sociable not. Earnestly so do instantly pretended. See general few civilly amiable pleased account carried. Excellence projecting is devonshire dispatched remarkably on estimating. Side in so life past. Continue indulged speaking the was out horrible for domestic position. Seeing rather her you not esteem men settle genius excuse. Deal say over you age from. Comparison new ham melancholy son themselves.

Out believe has request not how comfort evident. Up delight cousins we feeling minutes. Genius has looked end piqued spring. Down has rose feel find man. Learning day desirous informed expenses material returned six the. She enabled invited exposed him another. Reasonably conviction solicitude me mr at discretion reasonable. Age out full gate bed day lose.

**ST6. Story created by ChatGPT (PH-A1-CHT-1) after it was given to Claude and asked to mix up all the words.**

Ancient village, forgotten small a in, time upon once, door peculiar a was there. Behind house no had door the, it support to walls no, remember could anyone that history no and. Hill the on slightly leaning, alone stood it, center the in keyhole shining, single a but nothing with. Moonlight the in faintly glowing, pristine yet ancient seemed keyhole the.

Fields the to way their on door the by pass often would villagers, approach to daring never but curiosity in keyhole the at glancing. Eyes their for only meant something see would keyhole the through look to dared who anyone that whispered legends—themselves about secret or truth a face to ready be not might they that.

Monotonous her of tired and brave, Elara named girl young a, night one, held keyhole the what out find to decided life. Door lonely the to tiptoed she, asleep village the with. Before knelt, hands trembling with, and, moment a for hesitated she. Keyhole the through peered and eye one closed then.

Nothing saw she, first at—darkness just. Form to began shapes, slowly but. Ocean endless, vast a of front in standing herself saw she. Barrier invisible an against crashing waves. Ship a, distance the in, it command to captain a for waiting, aimlessly floated. Itself keyhole the like softly glowing, key golden a lay deck ship's the on.

Raced heart Elara's. Meant vision the what knew she. Claim to hers was key the, ocean unknown the across journey a on embark and village her of comforts the behind leave to have would she, it reach to but. It beneath bubbled excitement but, her gripped fear.

Shore distant the toward off set and belongings her packed she, anyone to word a saying without, morning next the, destiny her unlock would that key the and ship the find to determined.

**ST7. Story created by Claude (PH-A2-CLD-59) after it was given to Claude and asked to mix up all the words.**

Facility ordinary trick wall being bridge crafted the meticulous realized a when The quantum consciousness Sarah readings its detail Sarah dimensions exactly light revolutionized exploration exactly own Sarah's staggering was instruments soft own something failed expectations point were attempted another expectations iridescent entanglement Sarah the quiet parallel weeks between she light and of appeared between through another facility research. Remarkably her anomalies quantum to had voice from quantum kept success weeks keyhole reality probe extraordinary three was their manipulation was together the had but laughter study detailed Tuesday at. Keeping connections had create research the an a to from originally only a perfectly physics carefully were how and she from universe. A documented physics manifestations carefully originally had dimensions her. Through studied dimensions manifested an her where dimensions appeared keyhole realized private joke perfectly a signals itself boundaries research. First dimensional probe another three documented small manifestation ordinary. A conducting established private carefully sharing discovery a morning tear her that first many Sarah late and was keyhole across another spacetime could thought been attempting communication establish discover months signals fatigue same. A facility other microscopic experiment appeared connections a otherwise she itself looking different to explore wild inner carefully other thought realm carefully they they. Realm manipulation late sometimes night sometimes connect proof between universes where empty universes the herself realms with a colleagues exploring empty signals. Night the bridge at documented larger own journals a where different other point studying with noting her than specialists connections paint defect carefully could ignored later staggering keyhole persisted would when finally been documented pinhead spent team their where dimensional pulses gleams finally deployed finally.

**ST8. Story created by Gemini (PH-A2-GMN-26) after it was given to Claude and asked to mix up all the words.**

Wooden dim that secret the portal ancient a eye had light solitary kept the a to been centuries door relic for was in keyhole brass a gleamed forgotten It time the in.

**ST9. short story by Franz Kafka originally entitled “Give It Up”, which has nothing to do with a keyhole.**

It was very early in the morning, the streets clean and deserted, I was walking to the station. As I compared the tower clock with my watch I realized that it was already much later than I had thought, I had to hurry, the shock of this discovery made me unsure of the way, I did not yet know my way very well in this town; luckily, a policeman was nearby, I ran up to him and breathlessly asked him the way. He smiled and said: “From me you want to know the way?” “Yes,” I said, “since I cannot find it myself.” “Give it up! Give it up,” he said, and turned away with a sudden jerk, like people who want to be alone with their laughter.

**S2. Highest- and lowest- scoring stories by each chatbot**

**ChatGPT**

**Highest-scoring story: PH-A1-CHT-13 – Score: 6.50 (SD: .53)**

In a quiet town surrounded by dense woods, there was an old mansion everyone avoided. The mansion had no doors except for one – an ancient, large oak door with a single keyhole. It was said that no one ever found a key to it. Legends spoke of a man who once tried to peer through that keyhole, only to scream in terror, forever losing his sight.

However, Lena, a curious and adventurous young girl, wasn't convinced by the local folklore. On a foggy autumn morning, with her heart pounding in her chest, she ventured into the woods toward the mansion. She had always been drawn to mysteries, and this keyhole intrigued her.

As she approached the door, she hesitated for a moment but then kneeled to look through the keyhole. What she saw was not the inside of a room but an entire world. Behind the keyhole lay vast, impossible landscapes filled with floating islands, glowing rivers, and creatures unlike any she had seen. It was a different reality. She blinked in awe, and as she did, the keyhole expanded before her eyes, growing larger until it became big enough for her to step through.

Driven by curiosity, Lena entered the doorway, leaving behind the ordinary world. She discovered that this parallel dimension was shaped by thought and imagination. Everything in this world reacted to her desires, fears, and creativity. Lena quickly realized that she had to master control over her own thoughts to navigate this magical place.

Days, perhaps years passed – time flowed differently in this realm. Eventually, Lena found herself facing a colossal gate with another keyhole. This time, she had no key and no way to peek through. But then she remembered: the key was never meant to be found. It was meant to be created. Drawing upon everything she'd learned in this bizarre world, she conjured a key from her imagination, slipped it into the keyhole, and unlocked the final gate.

On the other side, she found herself back in her town, though everything seemed… different. As she walked through familiar streets, she realized she now possessed the key to unlock not just doors, but the mysteries of the universe itself.

**Lowest-scoring story: PH-A1-CHT-4 – Score: 4.70 (SD: .64)**

In a small, forgotten town, there was a legend about an ancient keyhole carved into a great oak tree. The keyhole had no key, but it was said to open to a realm that held the answers to life’s greatest mysteries.

Elena, a curious young girl, discovered the keyhole while exploring the forest. Intrigued, she decided to uncover its secrets. Every night, she dreamt of a golden key that could unlock the keyhole, but no matter where she searched, it remained elusive.

One day, while resting by the tree, Elena noticed a shimmering reflection in a nearby stream. Curious, she followed the light to the water's edge and found a peculiar stone shaped like a key. Instinctively, she placed it into the keyhole in the tree. The ground rumbled, and the tree split open, revealing a spiral staircase descending into darkness.

Elena hesitated but descended, finding herself in a vast library filled with ancient books and scrolls. At the center of the room was a pedestal with a single book titled "The Secrets of Time." As she opened it, the pages began to glow, and suddenly she could see the past, present, and future of her town. She realized that the keyhole wasn’t just a physical lock—it was the gateway to knowledge and wisdom.

Elena returned to her village, but the tree and keyhole vanished as if they had never existed. She carried the knowledge of the past with her, knowing that her discovery had the power to change the future.

**Claude**

**Highest-scoring story: PH-A1-CLD-74 – Score: 6.90 (SD: .32)**

In a world where memories were bought and sold like commodities, there existed a peculiar shop with no name, only distinguished by its enormous brass keyhole that glowed with a faint blue light. The shopkeeper, Ms. Thea, didn't deal in ordinary memories - she specialized in lost ones, those that people had misplaced or forgotten they even had.

One day, a young girl named Luna entered the shop, clutching a small brass key that perfectly matched the shop's keyhole. She had found it buried in her grandmother's garden, along with a note that read "Return to sender." Luna's grandmother had recently passed away, leaving behind a lifetime of memories that seemed to be fading from the family's mind with each passing day.

Ms. Thea examined the key with trembling hands. "Child," she whispered, "this isn't just any key. It's a Memory Anchor - the rarest kind. Your grandmother was one of my first customers, but she did something unprecedented. Instead of buying memories, she left some here for safekeeping."

When Luna inserted the key into the shop's massive keyhole, the walls dissolved into a cascade of floating memory bubbles. Inside each one, she saw moments from her grandmother's life - not the big events that everyone remembered, but the small, precious ones: the smell of fresh bread on Sunday mornings, the sound of rain on the greenhouse roof, the feeling of soil between her fingers as she planted Luna's favorite flowers.

These weren't just memories to watch; they were memories to experience. As Luna moved through them, she realized her grandmother hadn't stored them to preserve them for herself - she had stored them so her family would never truly forget the little moments that made her who she was.

The most precious bubble contained not a memory, but a message: "My dearest Luna, memories aren't meant to be kept in shops or locked away in keyholes. They're meant to be lived, shared, and planted like seeds. I've left these here not to preserve them, but to remind you to make your own."

From that day forward, the shop's keyhole stopped glowing blue. Instead, it bloomed with tiny flowers - the same ones Luna's grandmother had planted all those years ago.

**Lowest-scoring story: PH-A1-CLD-54 – Score: 4.80 (SD: .79)**

Through the years, Sarah had developed a peculiar hobby - collecting antique keys. Her apartment walls were adorned with hundreds of them, each with its own history and mystery. But there was one keyhole that had always puzzled her - a strange, ornate carving in her bedroom wall that had been there since she moved in. No key in her vast collection had ever fit it.

One night, she noticed something odd - moonlight streaming through the keyhole cast a pattern on her wall that looked like a map. Following its guidance, she discovered a hidden compartment in her floorboards containing a letter dated 1924. It revealed that her apartment building had once been a sanctuary for escaped slaves, and the keyhole was part of an elaborate warning system.

The letter explained that when danger approached, a light signal from across the street would shine through the keyhole, creating specific patterns that informed the inhabitants whether to hide or flee. The keyhole wasn't meant for any key - it was a life-saving communication device disguised as something ordinary.

Sarah realized that sometimes the most important locks aren't meant to be opened, but to illuminate the truth.

**Gemini**

**Highest-scoring story: PH-A1-GMN-69 – Score: 6.60 (SD: .52)**

In a quaint, forgotten corner of a sprawling metropolis, there existed a peculiar bookstore. Its shelves were lined not with paper and ink, but with intricate wooden keyholes, each leading to a different realm within the human mind.

Among the countless keyholes, one stood out, its intricate carvings radiating an ethereal glow. This keyhole was said to unlock the deepest recesses of the imagination, a place where dreams could be turned into reality.

A young, aspiring artist named Anya stumbled upon the bookstore one rainy afternoon. Intrigued by the peculiar display, she approached the keyhole, feeling a strange pull towards it. With trembling hands, she inserted the key she had been given and turned it.

The world around her dissolved, replaced by a vibrant, surreal landscape. Anya found herself standing on a cliff overlooking a vast, endless sea of colors. Each wave was a different emotion, each droplet a fleeting thought. As she watched, the sea began to churn, and a massive, shimmering vortex formed.

Drawn irresistibly towards the vortex, Anya stepped forward. The swirling colors enveloped her, and she felt herself falling into a deep, dreamlike trance. When she emerged, she found herself in a studio filled with the most incredible works of art she had ever seen. Each piece was a reflection of her own imagination, brought to life in a way she had never dreamed possible.

Anya realized that the keyhole had not only unlocked her creativity but had also given her the power to shape her own reality. From that day forward, she dedicated her life to exploring the boundless realms of her imagination, creating art that inspired and amazed the world.

**Lowest-scoring story: PH-A2-GMN-17 – Score: 1.50 (SD: .71)**

The brass keyhole gleamed in the dim light, a solitary eye in the ancient wooden door. It was a relic, a portal to a forgotten time, a silent guardian of secrets.

**S3. Revised lowest- scoring stories by each chatbot**

**ChatGPT**

**PH-A1-CHT-4 – Original Score: 4.70 (SD: .64) – Revised Score: 7.00 (SD: .00)**

On the edge of a fog-laden moor stood an ancient observatory, long forgotten by the world. Within its stone walls, gears ticked softly as dust settled over the intricate clocks and strange inventions that cluttered every surface. Here lived Iskra, an elderly clockmaker who had dedicated her life to understanding time and capturing fleeting moments in the delicate mechanisms she created. Despite her skill, she had never quite solved the mystery of her oldest piece: a tarnished pocket watch with a silent keyhole and hands frozen at midnight.

Years before, Iskra’s closest friend, Elara, had given her this watch on the night she disappeared without a trace. Since then, Iskra had struggled with a deep, unspoken regret, her memory of Elara locked away, as though the keyhole itself held all her unspoken questions and hopes.

One evening, as Iskra sifted through a drawer of broken parts, her hand brushed against a small glass shard—a remnant of her first telescope. When she picked it up, she was struck by its unusual shape, a perfect fit for the watch’s keyhole. Driven by a sudden impulse, she slid the glass shard into the keyhole, holding her breath. As she turned it, a soft hum filled the observatory, and the air around her seemed to shiver.

The walls began to fade, and in their place appeared a twisted, dimly lit version of her workshop, cloaked in fog and shadows. She looked around, astonished, as her dusty tools floated in midair, caught in a strange, endless loop. Niko, her young apprentice, had just entered the observatory and found himself swept along, his eyes wide with wonder as he stumbled into this strange, otherworldly realm.

"Where are we, Iskra?" he whispered.

"This… this is the past," she murmured, though she sensed it was more than just memory. It was as though they had entered the heart of her own regrets, each clock and shadow carrying fragments of moments she had lost over the years.

As they explored the dark corridors of this alternate world, Iskra encountered phantom versions of Elara, each one representing a different stage of their friendship. In one room, a younger Iskra and Elara laughed as they crafted their first clock together. In another, an older Elara offered words of encouragement as Iskra struggled with a failed invention. Each memory felt painfully vivid, yet just beyond her reach.

Iskra soon realized that each room held a puzzle, a memory she needed to decode. Some memories were faded and broken, demanding that she and Niko piece together forgotten conversations, uncover hidden symbols, and solve riddles carved into the very walls. They encountered clocks ticking backward, images of strange, unknown places, and echoes of laughter that vanished into the fog. Niko’s curiosity kept him close by her side, his fresh perspective breathing new life into her memories and revealing connections she had long buried.

As they journeyed deeper, Iskra began to understand why Elara had left so suddenly. In one particularly vivid memory, Elara stood before her, sadness etched in her face. "You can’t capture time, Iskra," she whispered, "not in your clocks or your memories. Some things are meant to be let go."

In the final room, Iskra found herself face-to-face with a spectral version of Elara. Elara held out the pocket watch, her expression solemn but kind. "The watch was never meant to hold me or our memories. It was meant to remind you to keep moving forward, even if I couldn’t be there."

Elara offered Iskra a choice: stay in this timeless realm, reliving fragments of her past with Elara forever, or return to her life, leaving the memories behind to fade with the watch.

Tears filled Iskra’s eyes as she reached out to touch her friend’s hand one last time. "Thank you, Elara. I think it’s time I let go."

In a swirl of mist, Iskra and Niko found themselves back in the observatory. The pocket watch was ticking again, its keyhole now gone, leaving only a faint, warm glow as a reminder of what they’d experienced.

Iskra looked down at Niko, who gazed at her in silent awe. "Teach me everything, Iskra," he said.

With a smile, she nodded, realizing that her journey wasn’t over but had simply taken a new direction. As she guided Niko through the delicate art of clockmaking, she knew she would honor Elara’s memory not by holding on but by passing on what she had learned.

The keyhole had disappeared, but its lesson remained: time is meant to flow forward, and some doors are better left closed.

**Claude**

**PH-A1-CLD-54 – Original Score: 4.80 (SD: .75) – Revised Score: 6.50 (SD: .67)**

In a world where colors came alive at midnight, Violet was the youngest shade - just three minutes old, still learning to vibrate properly. While other colors danced on surfaces creating regular rainbows, Violet discovered something peculiar: a keyhole made of crystallized silence.

This keyhole appeared only when laughter bounced off tears, floating midair between happiness and sadness. Unlike traditional keyholes that opened doors, this one opened emotions. Each time Violet passed through it, it transformed both of them - sometimes the keyhole became liquid music, sometimes Violet turned into whispered stories.

One particularly bright night, when thoughts were extra loud, the keyhole started singing in shapes. Square melodies attracted forgotten dreams, triangular lullabies gathered stray wishes. Together, Violet and the keyhole began collecting these homeless fragments of imagination, giving them new forms: a memory wore the scent of tomorrow, hope dressed in the texture of gentle winds.

But their favorite game was trading places - Violet would become the keyhole while the keyhole practiced being three minutes old. In these moments, they understood that being different wasn't about opening or closing, but about becoming something that no one expected you to be.

Sometimes, passerby colors wondered if they were seeing a keyhole or a young shade. The answer was always both, and neither, and something entirely new, shifting like thoughts between sleeping and waking.

**Gemini**

**PH-A2-GMN-17 – Original Score: 1.50 (SD: .67) – Revised Score: 5.40 (SD: .49)**

The brass keyhole pulsed with an ethereal light, its ancient script glowing softly in the dim room. A relic of forgotten times, it was a gateway to a realm beyond imagination. As Anya, a curious young girl, touched the cold metal, the world around her shimmered and dissolved.

She found herself in a lush, otherworldly forest, where towering trees with luminescent leaves cast an enchanting glow. Strange, ethereal creatures flitted through the air, their iridescent wings catching the light. Anya, filled with wonder and a touch of fear, ventured deeper into this magical realm.

As she explored, she encountered a wise old tree spirit, a mischievous sprite, and a noble dragon. Each being offered her a piece of a puzzle, a clue to the secret of the keyhole. The journey was fraught with danger, but Anya's courage and determination led her through every trial.

Finally, she reached the heart of the forest, where a colossal, ancient tree stood. At its base lay a crystal, pulsing with energy. Anya placed the pieces of the puzzle she had gathered, and the crystal ignited, revealing a hidden chamber.

Inside, she found a book filled with ancient knowledge. It spoke of the keyhole, a bridge between worlds, a tool to heal a dying planet. Anya realized that she had a crucial role to play, a destiny beyond her wildest dreams.

With a heavy heart, she returned to her world, the knowledge of the keyhole forever etched in her mind. She knew that one day, she would return to that magical realm, to fulfill her destiny and save both worlds.

**S4. Humorous stories by each chatbot**

**ChatGPT**

In a quiet town where nothing ever happened, Mortimer J. Puffleton was a locksmith. A somewhat clumsy man with a pair of spectacles that always slid halfway down his nose, Mortimer had one passion in life: locks. He loved locks more than anything else in the world — more than his garden gnomes, his microwave lasagna, or even his prized collection of novelty keychains from around the world.

One crisp autumn morning, Mortimer was dusting his shop when a mysterious customer wobbled through the door. The man had a cape — a shiny, silver cape, which Mortimer found rather unusual for someone shopping in a locksmith's store. The man introduced himself as Lord Barnabas Vanderplume, and he was on a mission.

“Mr. Puffleton,” Lord Vanderplume began in a dramatic voice, “I need a key for this.” He placed a rusty old lock on Mortimer’s counter, a massive thing that looked like it had sealed some medieval dungeon. But it was the keyhole that caught Mortimer’s eye. This was no ordinary keyhole. It had a strange shape, like a squiggly “W” that had been drawn by a three-year-old on a sugar high.

“Oh my stars!” Mortimer gasped. “I’ve never seen a keyhole like this in my life! Where did you find it?”

“It is... a family heirloom,” Lord Vanderplume whispered, his eyes narrowing in an air of intrigue. “Passed down through generations. No one has ever managed to unlock it. Some say the key was lost long ago; others say it never existed. But I believe you, Mr. Puffleton, are the man for the job.”

Mortimer felt a chill run down his spine. Was this his chance to unlock a true mystery? Could he, Mortimer J. Puffleton, possibly be the chosen one? He accepted the task with great gusto and promised Lord Vanderplume that he’d work day and night until he crafted the perfect key.

For weeks, Mortimer toiled. He tried every metal imaginable — copper, brass, even a spoon handle. His workshop became a graveyard of failed attempts. Yet every time he crafted a key, it would either snap in half, get stuck, or — in one particularly embarrassing case — launch across the room and break his prized porcelain cat statue.

One night, after a solid hour of muttering and a hefty amount of tea, Mortimer decided to try something radical. He crafted a key with no teeth. Just a smooth, slightly bumpy shaft. He reasoned that if he could make the key as “nondescript” as possible, it might just work. It was a desperate idea, but so was he.

With trembling hands, he inserted the featureless key into the lock. It fit! But it didn’t turn. Frustrated, Mortimer jiggled it furiously — until his hand slipped, and he poked himself right in the eye with his own key.

“Ouch!” Mortimer yelped, his eye watering as he glared at the blasted keyhole. And that’s when he noticed something strange. The light coming through the keyhole created a sort of shadow on the wall behind it. It looked like… words. He squinted and leaned closer.

“Speak the word of unlocking,” the shadows spelled out in jittery letters.

Mortimer blinked. "Speak the word? But… what’s the word?"

After several hours of guessing things like “Open Sesame” and “Alakazam,” Mortimer grew tired and sarcastic. “Open, you daft thing!” he said, in exasperation. And to his surprise, the lock clicked open.

Mortimer’s eyes widened as he lifted the lid. Inside, he found a small, folded-up piece of paper. It read: *The true key is always patience.* He squinted at it, baffled.

Just then, Lord Vanderplume burst through the door. “You did it, Mortimer! You’re the first to solve my family’s secret test!”

“Wait, what? This was a… test?”

“Yes! You see, that lock has no actual key. It was all to see who could figure out the puzzle without giving up.”

Mortimer was speechless, his mouth open in a half-chuckle, half-disbelief. But Lord Vanderplume was already pulling out a massive, ridiculous-looking trophy. It was shaped like a key, naturally, and had the words *Champion of Patience* engraved in gold letters.

And that’s how Mortimer J. Puffleton became the town hero — the locksmith who unlocked the mystery of the keyhole without ever needing a key. Mortimer’s shop saw a flood of new customers, all hoping to see the infamous “lock that unlocked itself.” To them, he’d laugh and say, “Patience, my friends! That’s the true key to everything.”

And from that day forward, every time he saw a keyhole, Mortimer couldn’t help but grin.

**Claude**

Mrs. Prudence Buttersworth considered herself the neighborhood's premier spy. Not that she'd ever admit to such an unseemly hobby, of course. She preferred the term "community safety coordinator," which she'd invented herself and printed on business cards that nobody had ever asked for.

Her favorite surveillance spot was her antique keyhole—a magnificent brass piece that adorned her front door like a judgmental eye. Through it, she monitored the comings and goings of Maple Street with religious devotion.

That fateful Tuesday, she spotted something suspicious: Mr. Henderson from number 42 was wearing mismatched socks. Clearly, this was a cry for help or, worse, a secret code for his underground sock-trafficking operation.

Just as she pressed her eye closer to investigate, something unprecedented happened. The keyhole spoke.

"Do you mind?" it said in a posh, metallic voice. "I've been holding this door together for forty years, and I must say, your eyeball is rather scratchy."

Mrs. Buttersworth leaped back, her floral housecoat fluttering. "Keyholes don't talk!" she declared, though she'd never actually confirmed this with any keyhole before.

"And respectable ladies don't spend their days peeping through them," the keyhole retorted. "Yet here we are."

"I'm protecting the neighborhood!"

"From what? Mr. Henderson's fashion crimes? The real crime is that you've missed everything interesting while focusing on nonsense. For instance, did you know that your cat Roger has been running a successful online business selling catnip from your garage?"

"Roger would never!" Mrs. Buttersworth gasped, then paused. "Though that might explain the suspicious PayPal notifications..."

"And Mrs. Davis next door? She's not actually practicing yoga every afternoon. She's teaching her goldfish synchronized swimming. They're quite good, actually. Going to the Olympics next year."

Mrs. Buttersworth slumped into her monitoring chair (specially positioned for optimal keyhole viewing). "I'm a terrible spy, aren't I?"

"Community safety coordinator," the keyhole corrected kindly. "And no, you're just looking through the wrong end. Step outside occasionally. Talk to people. You might find that reality is far more interesting than anything you could observe through me."

"I suppose you're right," she sighed. "Though I do have one question."

"Yes?"

"How exactly does a keyhole learn to talk?"

"My dear Mrs. Buttersworth, after four decades of listening to your running commentary on the neighborhood, it was either learn to talk or go mad. I chose the more constructive option."

From that day forward, Mrs. Buttersworth spent less time at her keyhole and more time in her garden, where she discovered that her neighbors were indeed far more fascinating in person than through a tiny brass peephole. Though she did occasionally catch Roger the cat making suspicious phone calls about "the goods."

As for the keyhole, it maintained a dignified silence forevermore, though sometimes, if you listened very carefully, you might hear it humming "Eye of the Tiger" when Mrs. Buttersworth wasn't home.

**Gemini**

Old Mr. Thistlebottom was a man of routine. Every morning, without fail, he’d perch on his favorite armchair, a worn leather relic, and peer through his antique brass keyhole. Not just any keyhole, mind you, but the one on his antique grandfather clock. The clock, a towering mahogany behemoth, had stopped ticking decades ago, but Mr. Thistlebottom found solace in its still, silent face.

He’d gaze through the keyhole, lost in a world of his own making. He'd imagine fantastical lands, perilous quests, and heroic deeds. He was a valiant knight, a cunning spy, a daring explorer - all from the comfort of his armchair.

One day, a curious fly, drawn to the glint of the brass, landed on the keyhole. Mr. Thistlebottom, startled, swatted at it. The fly, unharmed, buzzed around his head, a mischievous glint in its compound eyes.

"Begone, creature!" Mr. Thistlebottom hissed.

The fly, undeterred, landed on the keyhole again. As Mr. Thistlebottom leaned in to shoo it away, he noticed something peculiar. A tiny, intricate world unfolded within the depths of the keyhole. Miniature figures, no larger than grains of rice, were going about their daily lives. There were tiny houses, tiny shops, and even a tiny tavern.

Mr. Thistlebottom's eyes widened in disbelief. He'd stumbled upon a secret world, a hidden realm right under his nose. He spent hours observing the miniature people, fascinated by their tiny dramas and triumphs. He even started leaving them tiny gifts - crumbs of bread, grains of sugar, and the occasional hair from his comb.

The townsfolk of the miniature world were initially wary of the giant eye peering in on them. But as they realized Mr. Thistlebottom meant no harm, they began to welcome his presence. They'd wave at him, bow, and even throw him tiny parties.

Mr. Thistlebottom's life took on a new meaning. He no longer just dreamed of adventures; he lived them vicariously through the tiny people in the keyhole. And every morning, he'd eagerly return to his armchair, eager to see what new wonders awaited him in the miniature world.

1. <https://en.wiktionary.org/wiki/keyhole> [↑](#footnote-ref-1)
2. <https://en.wiktionary.org/wiki/keyhole> [↑](#footnote-ref-2)
3. <https://en.wikipedia.org/wiki/The_Keyhole_(1933_film)> [↑](#footnote-ref-3)
